# Supplementary material for: Upper critical solution temperature (UCST) phase transition of halide salts of branched polyethylenimine and methylated branched polyethylenimine in aqueous solutions
Source: Royal Society of Chemistry journal article supplement (doi:10.1039/c5cc08005c), 2015-10-26
Supplement: c5cc08005c1.pdf [file c5cc08005c1.pdf]

## Electronic Supplementary Information (ESI) for Chemical Communications

### Upper critical solution temperature (UCST) phase transition of halide salts of polyethylenimine and methylated polyethylenimine in aqueous solutions

Minwoo Noh,<sup>a</sup> Sunah Kang,<sup>a</sup> Yeongbong Mok,<sup>a</sup> Sojung Choi,<sup>a</sup> Jeongseon Park,<sup>a</sup> Jannick Kingma,<sup>a</sup> Ji-Hun Seo<sup>b</sup> and Yan Lee<sup>\*a</sup>

<sup>a</sup>Department of Chemistry, Seoul National University, Gwanak-ro 1, Gwanak-gu, Seoul 151-747, Republic of Korea.

<sup>b</sup>Department of Materials Science and Engineering, Korea University, 145 Anam-ro, Seongbuk-gu, Seoul 136-701, Republic of Korea.

#### Phase transition behavior of various polyethyleniminium (PEI) halide salts

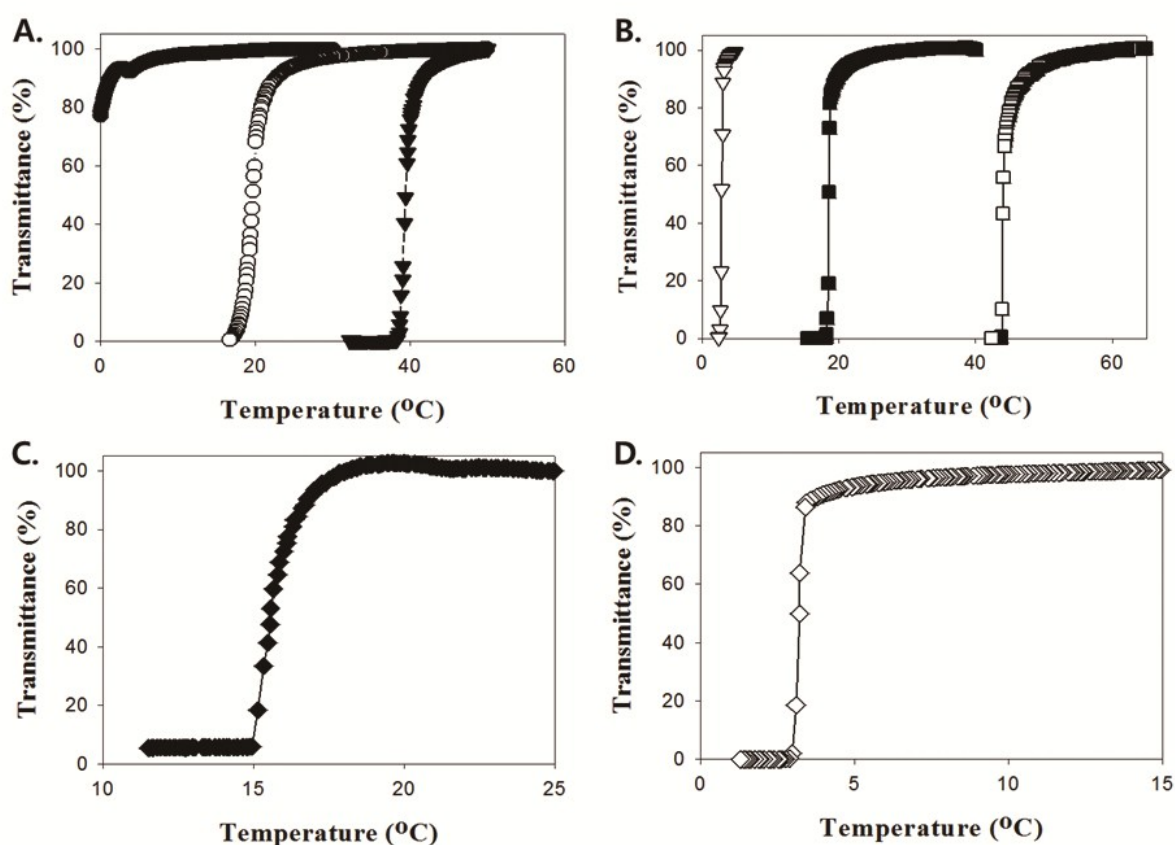

Fig. S1 (A) Phase transition behavior of PEIB at HBr/N ratio of 2 (polymer composition (w/w) = 20% (●), 25% (○), and 30% (▼)). (B) Phase transition behavior of PEIB at HBr/N ratio of 2.5 (polymer composition (w/w) = 20% (▽), 25% (■), and 30% (□)). (C) Phase transition behavior of PEII at a polymer composition of 35% (w/w) and HI/N ratio of 1.5. (D) Phase transition behavior of PEIC at a polymer composition of 20% (w/w) and HCl/N ratio of 4.0.

*pH of the polymer-halide salt solutions<sup>a</sup>*

**A.**

| Composition (w/w%) <sup>b</sup> |       |       |        |       |       |       |
|---------------------------------|-------|-------|--------|-------|-------|-------|
|                                 | HCl   | HBr   |        |       |       | HI    |
|                                 | 20wt% | 20wt% | 25wt%  | 30wt% | 35wt% | 35wt% |
| 1.5eq <sup>c</sup>              | —     | 0.53  | 0.44   | 0.15  | -0.25 | 0.25  |
| 2.0eq                           | —     | 0.40  | 0.33   | 0.050 | —     | —     |
| 2.5eq                           | —     | 0.20  | -0.040 | -0.22 | —     | —     |
| 4.0eq                           | -0.40 | —     | —      | —     | —     | —     |

**B.**

| Composition (w/w%) <sup>b</sup>        |            |            |            |            |            |            |
|----------------------------------------|------------|------------|------------|------------|------------|------------|
|                                        | 10wt%      | 20wt%      | 30wt%      | 35wt%      | 40wt%      | 50wt%      |
| <b>MPEII<sub>0.38</sub> (0.80 kDa)</b> | <b>3.7</b> | <b>3.4</b> | <b>3.4</b> | <b>—</b>   | <b>3.4</b> | <b>3.6</b> |
| <b>MPEII<sub>0.35</sub> (25 kDa)</b>   | <b>4.4</b> | <b>4.4</b> | <b>—</b>   | <b>4.6</b> | <b>—</b>   | <b>4.3</b> |

<sup>a</sup>The pH value of the solution was measured by the pH meter (SevenEasy™, Mettler-Toledo, Switzerland) with the appropriate pH range of 2-11. Extreme pH values were automatically calculated by the instrument through extrapolation.

<sup>b</sup>Composition of polymer halide salts in water

<sup>c</sup>Equivalent of HX to total amines (N) in *b*-PEI

Table S1. pH values of (A) the PEI halide solutions and (B) MPEII solutions.

Determination of the quaternary ammonium degree of MPEII<sub>0.35</sub> (25 kDa) (A) and MPEII<sub>0.38</sub> (0.80 kDa) (B)

A. MPEII<sub>0.35</sub> (25 kDa)

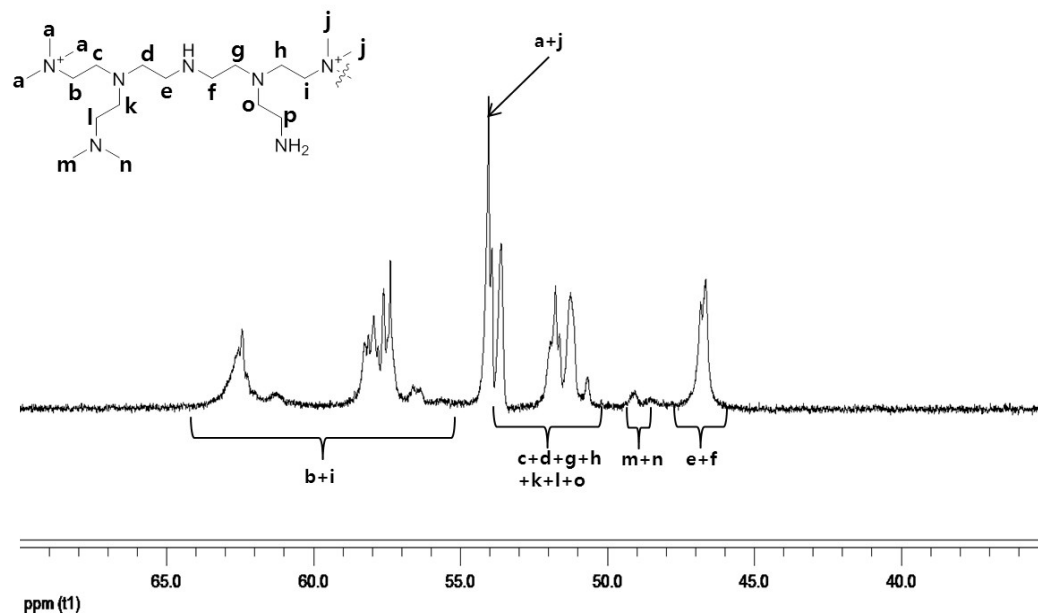

B. MPEII<sub>0.38</sub> (0.80 kDa)

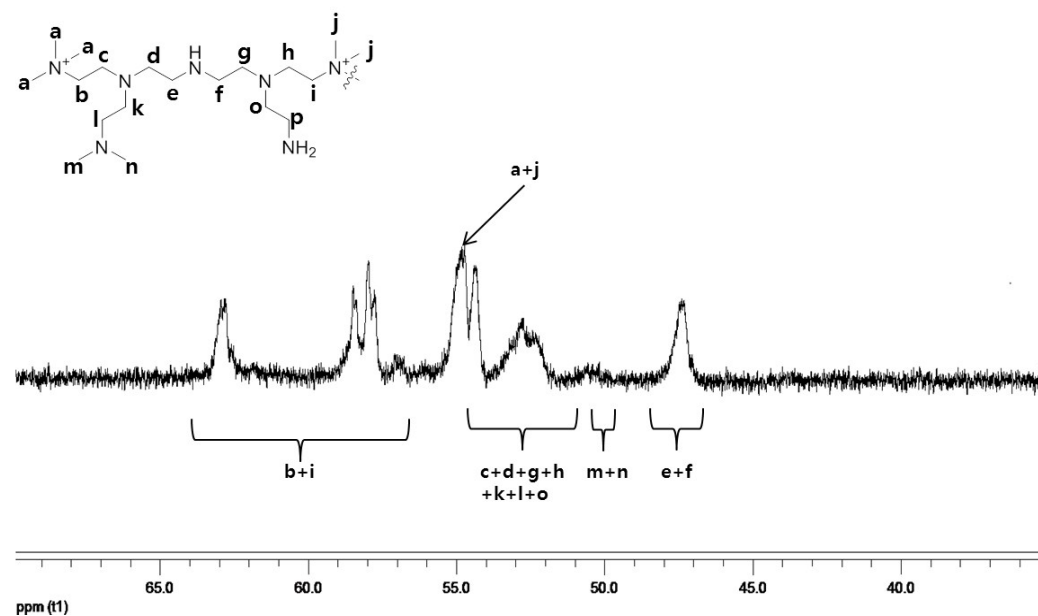

Fig. S2 The inverted gate (INVGATE) <sup>13</sup>C NMR spectra of MPEII<sub>0.35</sub> (25 kDa) (A) and MPEII<sub>0.38</sub> (0.80 kDa) (B).

Hysteresis of MPEII<sub>0.35</sub> (25 kDa)

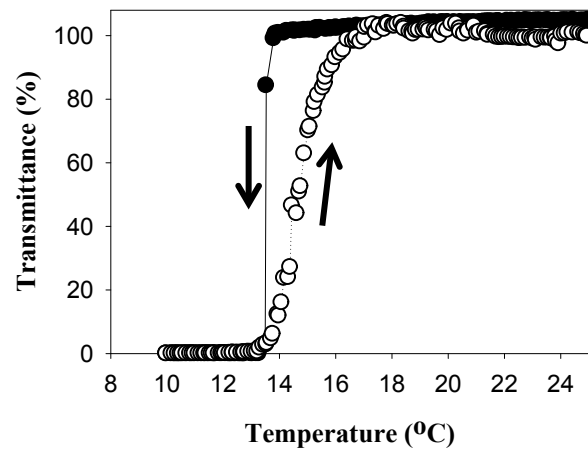

Fig. S3 Hysteresis of MPEII<sub>0.35</sub> (25 kDa) at 20% (w/w) polymer composition (Cooling (●) and heating (○)).
